# Supplementary material for: Lack of Transmission of Chronic Wasting Disease Prions to Human Cerebral Organoids
Source: PubMed Central journal article supplement (PMC11138967; doi:10.3201/eid3006.231568), 2024-06
Supplement: 23-1568-Techapp-s1.pdf [file 23-1568-Techapp-s1.pdf]

*EID cannot ensure accessibility for supplementary materials supplied by authors. Readers who have difficulty accessing supplementary content should contact the authors for assistance.*

# Lack of Transmission of Chronic Wasting Disease Prions to Human Cerebral Organoids

## Appendix

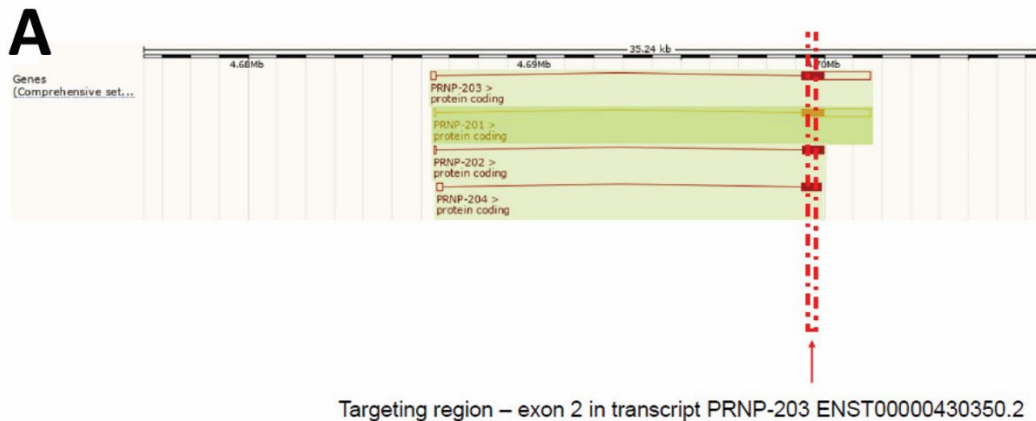

## **B** The activity and specificity of gRNA for *PRNP*

| C2013-g1 | Sequence             | PAM | Exon | Activity | Off-target |
|----------|----------------------|-----|------|----------|------------|
|          | GCTTCGGGCGCTTCTTGACG | AGG | 2    | 51       | 89         |

  

| Guide Details |    | OFF-TARGET ANALYSIS |   |   |   |   |       |
|---------------|----|---------------------|---|---|---|---|-------|
| Cut site      |    | Mismatches          | 0 | 1 | 2 | 3 | Total |
| GC %          | 65 | Coding              | 0 | 0 | 0 | 0 | 0     |
| Activity      | 51 | Non-coding          | 0 | 0 | 0 | 2 | 2     |
| Off-target    | 89 |                     |   |   |   |   |       |

---

| C2013-g2 | Sequence            | PAM | Exon | Activity | Off-target |
|----------|---------------------|-----|------|----------|------------|
|          | CTGGGGCAGCCGATACCCG | GGG | 2    | 61       | 93         |

  

| Guide Details |    | OFF-TARGET ANALYSIS |   |   |   |   |       |
|---------------|----|---------------------|---|---|---|---|-------|
| Cut site      |    | Mismatches          | 0 | 1 | 2 | 3 | Total |
| GC %          | 75 | Coding              | 0 | 0 | 0 | 0 | 0     |
| Activity      | 61 | Non-coding          | 0 | 0 | 0 | 4 | 4     |
| Off-target    | 93 |                     |   |   |   |   |       |

# C gRNA profiles at the locus (*PRNP*)

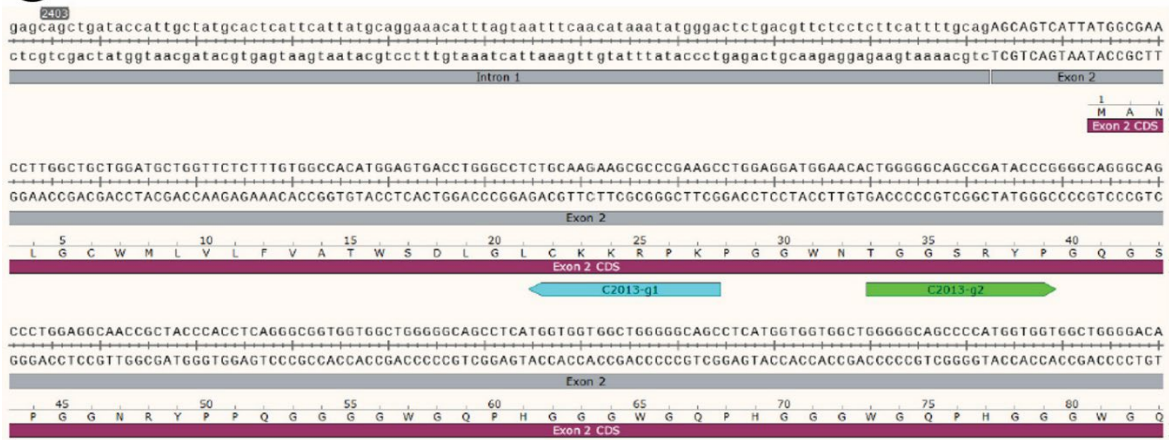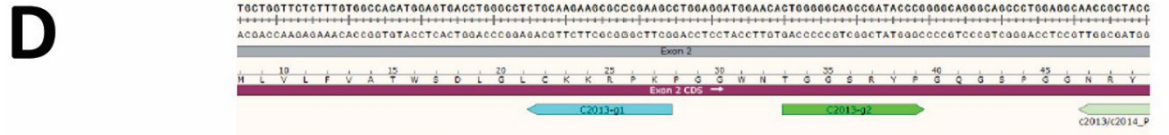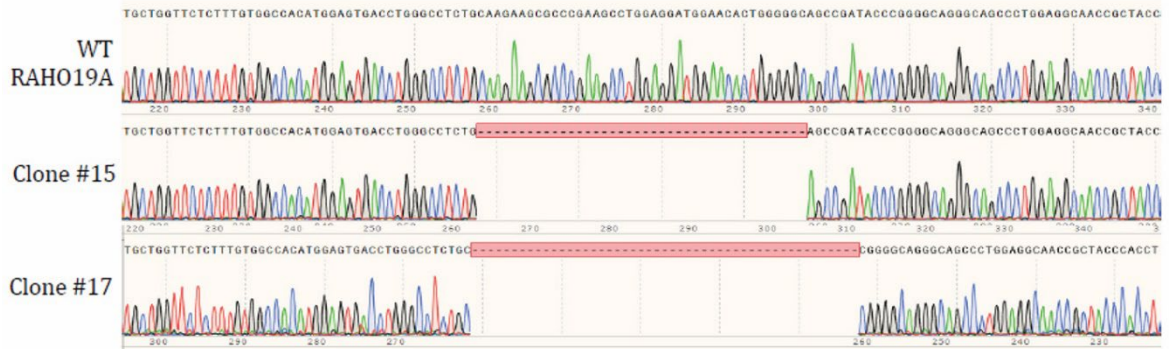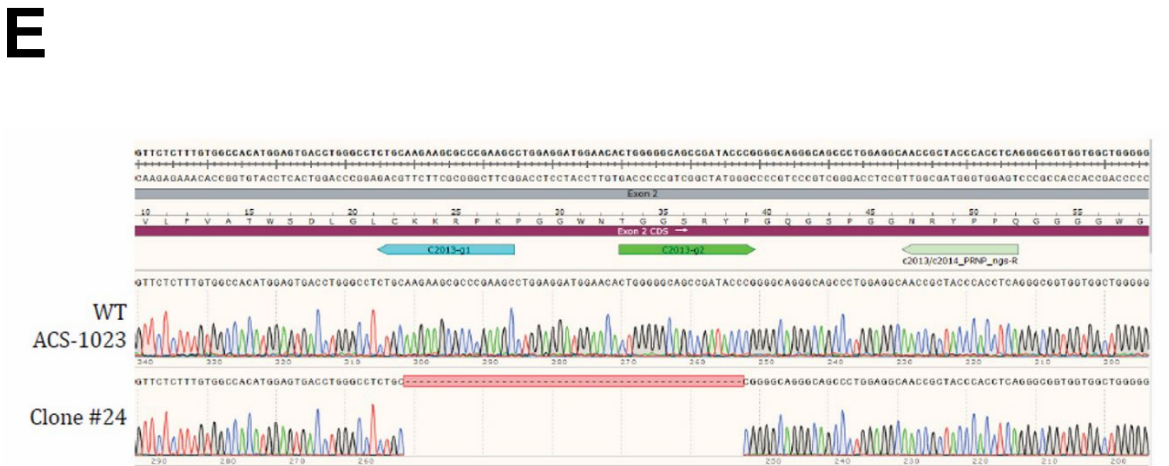

**Appendix Figure 1.** Generation of PRNP KO iPSCs. **A.** *PRNP* region targeted for frameshift mutation. **B.** gRNA design, activity and off-target activity and mismatch. **C.** gRNA locations with the prion protein coding region of exon 2. Sequencing of the clones from the 129MM (**D**) and 129M/V (**E**) iPSC lines.

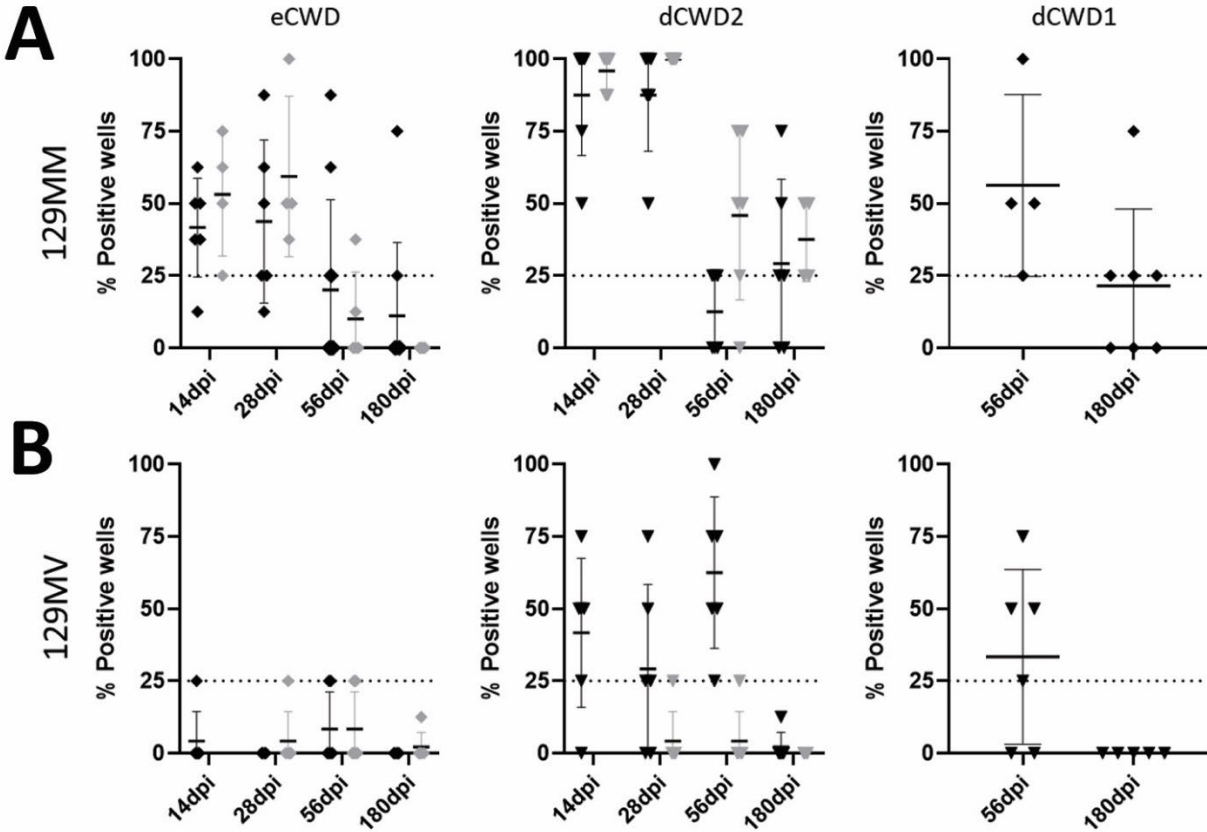

**Appendix Figure 2.** Loss of input seeding activity over time. RT-QuIC positive wells showing the decline of the residual inoculum over time. Dots show the percentage positive wells of a single organoid with WT shown in black and PRNP knockout in grey, bars show the mean and standard deviation.

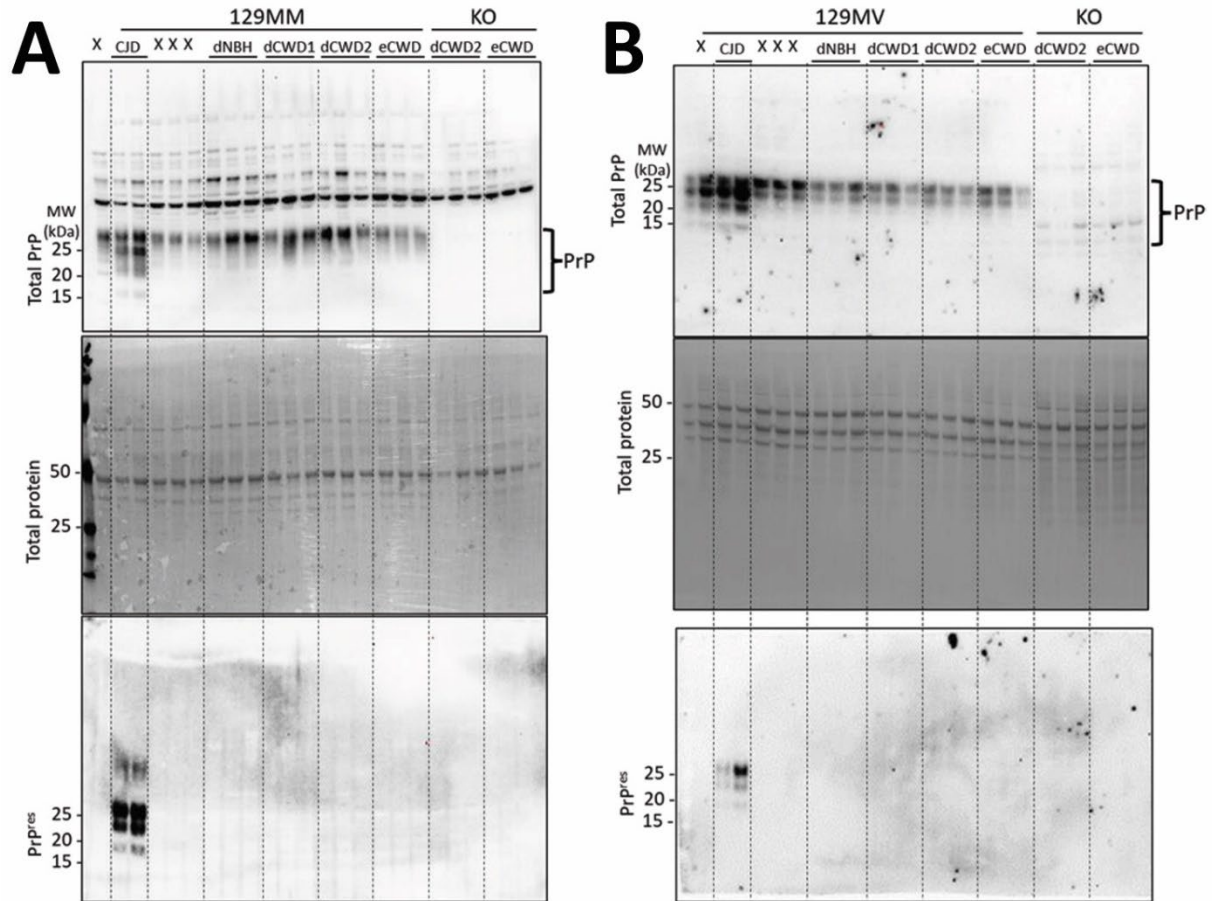

**Appendix Figure 3.** Uncropped western blots. Uncropped, full sized western blots shown in Figure 4. “X” indicates lanes that were cropped from Figure 4 as they were not pertinent to this study.

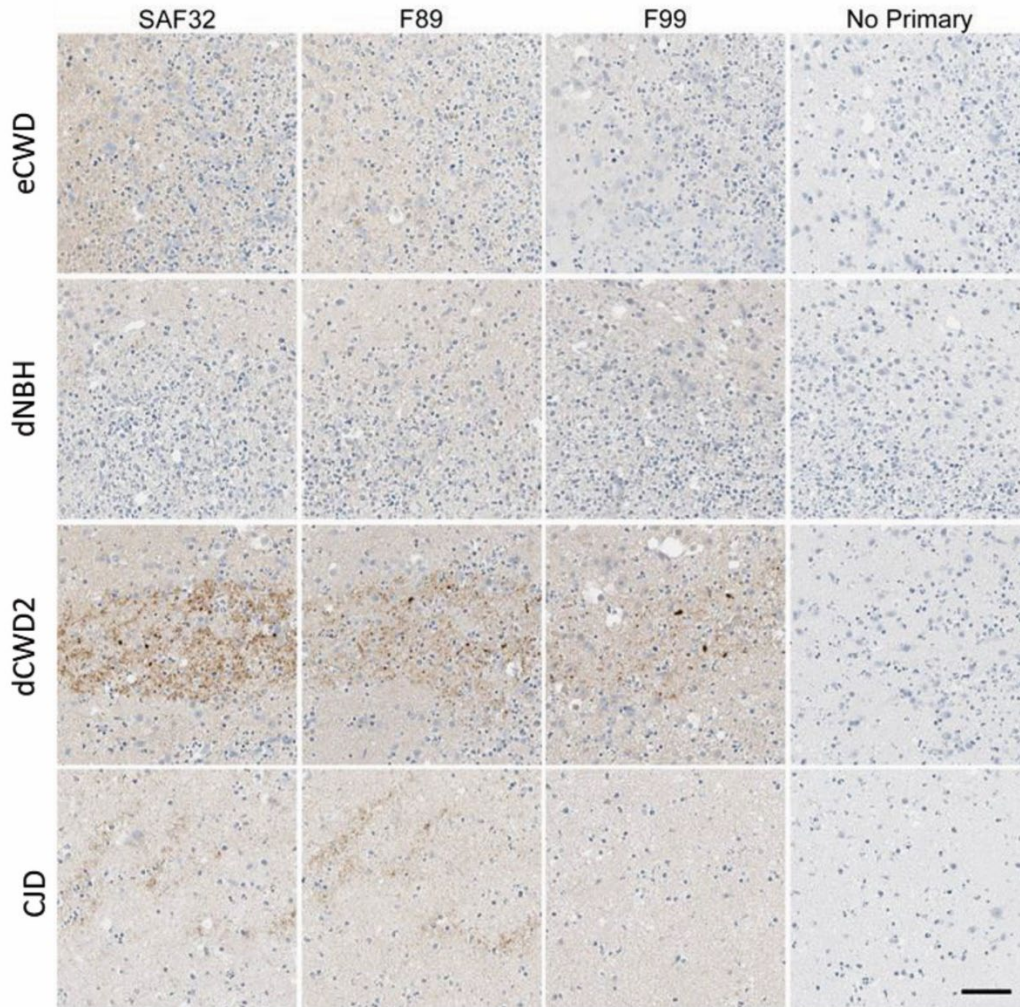

**Appendix Figure 4.** CWD inoculum persists in organoids. Immunohistochemistry staining for PrP (brown) using the antibodies indicated and showing that detected PrP deposits are residual cervid PrP.
